# Supplementary material
Source: Elsevier journal article supplement (https://www.sciencedirect.com/science/article/pii/S0210480613004191)
Supplement: mmc1 [file S0210480613004191:mmc1.docx]

**MATERIAL SUPLEMENTARIO**

Resumen de resultados estadísticos obtenidos en el consenso de expertos y nivel de consenso grupal alcanzado para las diferentes cuestiones planteadas. Se presentan en bloques: 1. Definición, clasificación, detección y diagnóstico diferencial de la vejiga hiperactiva (VH); 2. Tratamiento médico de la vejiga hiperactiva (VH); 3. Tratamiento quirúrgico de la vejiga hiperactiva (VH); 4. Papel de la onabotulinumtoxin A en la vejiga hiperactiva (VH)

| **BLOQUE 1: DEFINICIÓN, CLASIFICACIÓN, DETECCIÓN Y DIAGNÓSTICO DE LA VH** | | | | |
| --- | --- | --- | --- | --- |
|  | **Mediana** | **% Panelistas en contra** | **Rango intercuartílico** | **Resultado** |
| **A. ¿Cree que la actual definición y clasificación de vejiga hiperactiva (VH) es adecuada y abarca los posibles aspectos clínicos y funcionales?** | | | | |
| 1. La actual definición de VH es adecuada para la asistencia y abarca los posibles aspectos clínicos y funcionales. | 3 | 19,5 | 0 | Rechazada |
| 2. La actual definición de VH es adecuada para la asistencia, pero debería incluir su carácter crónico y la posibilidad de que los síntomas estén producidos por patología orgánica. | 7 | 30,8 | 3 | Aceptada |
| 3. La actual definición de VH no es adecuada porque identifica bien la clínica, pero no la posible etiología subyacente que, además de idiopática y neurógena, puede ser secundaria a otras patologías (síntomas secundarios a patología obstructiva, deficiencia estrogénica, poliuria y nocturia de diferentes etiologías, metabólicas, secundaria a fármacos, litiasis vesical, carcinoma *in situ,* disfunción de vaciado, etc.). | 8 | 23,1 | 1 | Aceptada |
| 4. La visión de la VH como una entidad clínica uniforme evita el estudio de la causa subyacente de cada uno de los síntomas, favorece la sobremedicación y sobretratamiento de los síntomas leves y la indicación del tratamiento farmacológico sin el estudio de la fisiopatología subyacente a esos síntomas. | 8 | 23,1 | 2 | Aceptada |

| **B. ¿Existen diferencias en la etiología y la fisiopatología de la VH entre ambos sexos y en diferentes grupos de edades?** | | | | |
| --- | --- | --- | --- | --- |
| 5. La prevalencia de la VH aumenta con la edad y es más frecuente en la mujer. | 8 | 7,7 | 2 | Aceptada |
| 6. Existen diferencias relevantes en la etiología y la fisiopatología de la VH entre ambos sexos y en diferentes grupos de edades. | 8 | 7,7 | 2 | Aceptada |
| 7. La posibilidad de diferentes etiologías entre ambos sexos y en diferentes edades obliga a buscar la etiología de la VH para aplicar un tratamiento adecuado. | 8 | 5,1 | 1 | Aceptada |
| 8. La etiología y la fisiopatología de la VH en el anciano suele ser multifactorial. | 9 | 0,0 | 1 | Aceptada |

| **C. ¿Es necesaria una herramienta de cribado de VH/incontinencia urinaria (IU) en Atención Primaria?** | | | | |
| --- | --- | --- | --- | --- |
| 9. No se necesita una herramienta de cribado de VH/IU en Atención Primaria porque su diagnóstico es fácil. | 3 | 19,5 | 0 | Rechazada |
| 10. No es conveniente usar una herramienta de cribado de VH/IU en Atención Primaria porque puede inducir sobretratamiento y la realización de estudios y derivaciones a Atención Especializada innecesarios. | 3 | 20,0 | 0 | Rechazada |
| 11. Se necesita mejorar el conocimiento de la patología en Atención Primaria, Especializada (incluida Ginecología, Geriatría, Medicina Interna) y en la población general. | 8 | 7,7 | 2 | Aceptada |
| 12. Sería conveniente tener una herramienta de cribado en Atención Primaria. Deberá ser un test con pocos ítems, rápido y sencillo de usar y que pueda ser usado en la consulta de enfermería. | 8 | 14,6 | 2 | Aceptada |
| 13. Se debe reforzar el mensaje de papel del urólogo como especialista al que derivar los casos complejos o que no responden al tratamiento inicial. | 9 | 2,6 | 1 | Aceptada |

| **D. ¿Existen diferencias específicas clínicas, diagnósticas, terapéuticas o pronósticas en la presencia o no de hiperactividad del detrusor en los pacientes con VH?** | | | | |
| --- | --- | --- | --- | --- |
| 14. Es una cuestión muy debatida y debe individualizarse la respuesta en cada tipo de VH (neurógena, idiopática, secundaria y sus tipos). | 8 | 10,3 | 2 | Aceptada |
| 15. Los pacientes con VH idiopática con hiperactividad del detrusor presentan más incontinencia urinaria de urgencia. | 7 | 26,8 | 3 | Aceptada |
| 16. La hiperactividad del detrusor no condiciona mejor o peor respuesta al tratamiento, ya sea farmacológico, con neuromodulación o con onabotulinumtoxin A | 3 | 34,1 | 4 | No consenso |
| 17. El estudio urodinámico debe hacerse en todos los pacientes neurógenos y en aquellos pacientes con VH idiopática que no responden al tratamiento inicial adecuado, si se va a iniciar un tratamiento más agresivo. | 9 | 2,6 | 1 | Aceptada |
| 18. El estudio urodinámico también debe hacerse en IU compleja. | 9 | 5,3 | 1 | Aceptada |

| **E. ¿Es inexcusable el papel de la hoja de frecuencia/volumen, diario miccional y escala de urgencia en la evaluación de la VH?** | | | | |
| --- | --- | --- | --- | --- |
| 19. El diario miccional es la prueba más eficaz en la evaluación en Atención Primaria y secundaria de IUE o IUU. | 8 | 12,8 | 2 | Aceptada |
| 20. La evaluación de los síntomas del tracto urinario inferior mediante el diario miccional tiene un valor diagnóstico y terapéutico, pues le da información al médico y al paciente de su patrón miccional y de ingesta reales, cuantifica los síntomas y permite medir el efecto del tratamiento. | 8 | 5,1 | 2 | Aceptada |
| 21. La mejor forma de evaluar los síntomas es el diario miccional de 3 días, aunque no todos los pacientes son capaces o quieren realizarlo, ni todos los médicos tienen el tiempo y la formación para interpretarlos. | 8 | 15,4 | 1 | Aceptada |
| 22. Se pueden usar hojas de frecuencia/volumen para confirmar la presencia de los síntomas y usar el diario miccional en casos de discordancia con los datos de la historia clínica, en Atención Especializada e Investigación. | 7 | 12,2 | 1 | Aceptada |
| 23. La hoja de frecuencia/volumen, el diario miccional y/o la escala de urgencia en la evaluación de la VH no son imprescindibles, aunque sí convenientes. | 7 | 27,5 | 3 | Aceptada |
| 24. La hoja de frecuencia/volumen, el diario miccional y/o la escala de urgencia en la evaluación de la VH no mejoran el diagnóstico de las pacientes con VH y por tanto son prescindibles. | 2 | 7,7 | 2 | Rechazada |

| **BLOQUE 2: TRATAMIENTO MÉDICO** | | | | |
| --- | --- | --- | --- | --- |
|  | **Mediana** | **% Panelistas en contra** | **Rango intercuartílico** | **Resultado** |
| **A. Dado que la VH es una patología benigna, ¿el algoritmo terapéutico debe seguir un esquema escalonado y progresivo?** | | | | |
| 25. El algoritmo terapéutico debe seguir un esquema escalonado y progresivo en la aplicación de las alternativas de tratamiento, aunque este debe individualizarse en cada paciente para optimizar la respuesta y minimizar los efectos adversos. | 8 | 0,0 | 1 | Aceptada |
| 26. Se sugieren dos niveles de tratamiento: el inicial (tratamiento conservador, fármacos antimuscarínicos) y el especializado (neuromodulación, onabotulinumtoxin A, cirugía, estimulación del nervio tibial posterior). | 9 | 0,0 | 1 | Aceptada |
| 27. La utilización de este esquema terapéutico puede variar en relación con las preferencias de los pacientes. | 8 | 12,2 | 2 | Aceptada |
| 28. La utilización de este esquema terapéutico puede variar en relación con las contraindicaciones de los tratamientos. | 8 | 7,9 | 2 | Aceptada |
| 29. Algunos pacientes pueden beneficiarse de tratamiento combinados. | 8 | 5,1 | 1 | Aceptada |

| **B. ¿Son beneficiosos los cambios en el estilo de vida en el tratamiento de la VH?** | | | | |
| --- | --- | --- | --- | --- |
| 30. Las recomendaciones de cambio de estilo de vida en el tratamiento de la VH son beneficiosas en los pacientes que tienen hábitos que modificar (ingesta elevada de líquidos y cafeína, sobrepeso, estreñimiento crónico, etc.). | 8 | 7,7 | 2 | Aceptada |
| 31. Las recomendaciones de cambio de estilo de vida en el tratamiento de la VH resultan de baja eficacia y poco aplicables en la práctica clínica. | 3 | 14,6 | 1 | Rechazada |
| 32. Los/las pacientes muestran una baja adherencia a las recomendaciones de cambio de estilo de vida en el tratamiento de la VH. | 7 | 22,0 | 0 | Aceptada |
| 33. Se debe comprobar el efecto de la supresión temporal de la cafeína u otras sustancias (picantes, alcohol, etc.) de la dieta antes de retirarla definitivamente. | 7 | 7,5 | 0 | Aceptada |
| 34. Las recomendaciones de cambio de estilo de vida deben asociarse al tratamiento farmacológico de la VH. | 7 | 25,6 | 2 | Aceptada |
| 35. Los diuréticos deben sustituirse por otro antihipertensivo en los pacientes con VH. | 8 | 12,5 | 1 | Aceptada |

| **C. ¿Considera útil el entrenamiento de la musculatura del suelo pélvico (EMSP) en el tratamiento de la IU secundaria a VH?** | | | | |
| --- | --- | --- | --- | --- |
| 36. Los ejercicios de EMSP son útiles pero menos eficaces que en la IUE. | 7 | 23,1 | 1 | Aceptada |
| 37. Los ejercicios de EMSP no están indicados en todas las pacientes con VH. | 7 | 25,6 | 3 | Aceptada |
| 38. La indicación de los ejercicios de EMSP dependen de los recursos disponibles. | 7 | 46,3 | 5 | No consenso |
| 39. Los ejercicios de EMSP son efectivos en pacientes motivadas y monitorizadas (dirigidas por fisioterapeutas o enfermeras entrenadas). | 8 | 10,5 | 2 | Aceptada |

| **D. ¿Son los antimuscarínicos actuales suficiente solución para tratar la VH?** | | | | |
| --- | --- | --- | --- | --- |
| 40. Los antimuscarínicos tienen una baja tasa de adherencia en el tratamiento de la VH. | 7 | 31,6 | 2 | Aceptada |
| 41. El precio de algunos antimuscarínicos repercute en la adherencia en el tratamiento de la VH. | 7 | 13,2 | 1 | Aceptada |
| 42. Los antimuscarínicos tienen una baja eficacia en el tratamiento de la VH. | 3 | 41,5 | 4 | No consenso |
| 43. Los antimuscarínicos no responden a las expectativas de los pacientes con VH. | 7 | 17,1 | 0 | Aceptada |
| 44. El manejo clínico de los antimuscarínicos no suele ser apropiado en las consultas (cambio de dosis, asociación, posología). | 7 | 46,3 | 4 | No consenso |

| **E. En la práctica clínica diaria, ¿deberían arbitrarse mecanismos de seguimiento y adherencia terapéutica al tratamiento en VH?** | | | | |
| --- | --- | --- | --- | --- |
| 45. Hay que mejorar la información del paciente con VH sobre el carácter crónico de la enfermedad y sobre el objetivo del tratamiento. | 8 | 0,0 | 2 | Aceptada |
| 46. Puede ser útil disponer de un material escrito de calidad que informe con claridad de aspectos clave de la VH (concepto, diagnóstico, tratamiento y recomendaciones). | 8 | 2,6 | 2 | Aceptada |
| 47. Debe fomentarse la indicación simultánea de tratamientos conservadores. | 8 | 10,3 | 2 | Aceptada |
| 48. Debe optimizarse el uso actual de los tratamientos antimuscarínicos en la VH, empleando la menor dosis eficaz. | 8 | 10,3 | 2 | Aceptada |
| 49. Se debe reforzar el seguimiento del paciente con VH mediante visitas periódicas. | 8 | 25,6 | 3 | Aceptada |
| 50. Podría ser útil implicar a enfermeras o fisioterapeutas para mejorar el seguimiento del tratamiento de la VH. | 8 | 15,4 | 2 | Aceptada |
| 51. La implicación del paciente con VH (diario miccional, cuestionario de calidad de vida) puede mejorar los resultados del tratamiento. | 8 | 7,9 | 2 | Aceptada |

| **BLOQUE III: TRATAMIENTO QUIRÚRGICO** | | | | |
| --- | --- | --- | --- | --- |
|  | **Mediana** | **% Panelistas en contra** | **Rango intercuartílico** | **Resultado** |
| **A. Antes de iniciar un tratamiento de segunda línea de la VH, ¿considera necesario medir la intensidad/gravedad de los síntomas y su repercusión sobre calidad de vida** | | | | |
| 52. Antes de iniciar un tratamiento de segunda línea de la VH es necesario medir la intensidad/gravedad de los síntomas y su repercusión sobre la calidad de vida. | 9 | 0,0 | 1 | Aceptada |
| 53. El diario miccional de 3 días con escala de urgencia es una de las herramientas más útiles para la valoración y el seguimiento de la VH. | 8 | 2,6 | 1 | Aceptada |
| 54. Es necesario emplear un cuestionario específico que valore la sintomatología de la VH (con o sin incontinencia) y su impacto en la calidad de vida. | 8 | 10,3 | 2 | Aceptada |
| 55. El cuestionario OABQ-SF es el más adecuado tanto para la valoración clínica de la VH como para la monitorización de su tratamiento. | 7 | 28,2 | 2 | Aceptada |

| **B. ¿Existe una indicación precisa del concepto de vejiga hiperactiva refractaria (VHR)?** | | | | |
| --- | --- | --- | --- | --- |
| 56. Se considera VHR si el paciente no responde a tratamiento conservador y antimuscarínico, tras emplear dos anticolinérgicos a dosis máxima, al menos durante 8 semanas. | 8 | 20,5 | 2 | Aceptada |
| 57. En pacientes con manifiesta intolerancia o contraindicación a los fármacos antimuscarínicos se consideran las mismas opciones de tratamiento que para la VHR. | 8 | 12,8 | 1 | Aceptada |
| 58. En la VHR pueden considerarse tratamientos de primera elección el empleo de onabotulinumtoxin Ay neuromodulación sacra, dependiendo de los criterios clínicos, la voluntad del paciente y la disponibilidad del centro. | 8 | 17,9 | 2 | Aceptada |
| 59. En casos de vejiga neurógena refractaria (hiperactividad neurogénica del detrusor refractaria) se considera que la onabotulinumtoxin A es el tratamiento de primera elección. | 8 | 2,6 | 1 | Aceptada |

| **C. En la práctica clínica habitual, ¿se asocian antimuscarínicos a otras terapias de segunda línea para conseguir mejor respuesta?** | | | | |
| --- | --- | --- | --- | --- |
| 60. En la práctica clínica habitual los antimuscarínicos asociados a otras terapias de segunda línea permiten obtener mejor respuesta terapéutica. | 7 | 28,9 | 2 | Aceptada |
| 61. Tras el tratamiento con onabotulinumtoxin A se puede lograr una reversión de la refractariedad a antimuscarínicos. | 6 | 30,7 | 1 | No consenso |
| 62. El uso de antimuscarínicos de rescate (cuando se observa una disminución del efecto de onabotulinumtoxin A, en espera de la siguiente punción) permite prolongar el efecto de onabotulinumtoxin A. | 7 | 30,8 | 3 | Aceptada |
| 63. En VH, cuando se observa la disminución del efecto de onabotulinumtoxin A, puede considerarse la instilación de oxibutininaendovesical. | 6 | 12,5 | 1 | No consenso |

| **D. ¿Considera de alta utilidad los tratamientos con estimulación eléctrica periférica, tibial posterior y neuromodulación?** | | | | |
| --- | --- | --- | --- | --- |
| 64. No existe suficiente evidencia científica de la utilidad de la electroestimulación periférica en VH. | 7 | 41,5 | 4 | No consenso |
| 65. La estimulación del nervio tibial posterior es un procedimiento sencillo que podría tener un papel relevante en pacientes con VHR antes de pasar a un tratamiento con onabotulinumtoxin A y/o neuromodulación sacra, aunque existan pocos estudios que demuestren su efecto a largo plazo. | 7 | 30,8 | 2 | Aceptada |
| 66. La neuromodulación sacra es una técnica reversible de utilidad para el tratamiento de la VHR, aunque de alto coste económico y elevada dificultad técnica (requiere entrenamiento específico). | 8 | 10,3 | 2 | Aceptada |

| **E. En los casos en que la VH se asocia a prolapso genital, ¿piensa que la corrección quirúrgica del mismo mejorará la hiperactividad vesical?** | | | | |
| --- | --- | --- | --- | --- |
| 67. Se debería realizar un estudio urodinámico previo a cualquier corrección quirúrgica de prolapso de órganos pélvicos (POP). | 8 | 28,2 | 3 | Aceptada |
| 68. Los POP sintomáticos deben ser intervenidos con independencia de que se demuestre hiperactividad del detrusor. | 8 | 7,7 | 2 | Aceptada |
| 69. Se considera indicado intervenir los POP de alto grado sintomático. | 9 | 0,0 | 1 | Aceptada |
| 70. La colocación temporal de un pesario puede predecir la posible resolución de hiperactividad vesical tras la corrección del POP. | 7 | 9,8 | 1 | Aceptada |
| 71. Si la hiperactividad vesical es secundaria a un prolapso obstructivo, está claramente justificada la intervención quirúrgica. | 9 | 10,3 | 1 | Aceptada |

| **BLOQUE IV: ONABOTULINUMTOXIN A** | | | | |
| --- | --- | --- | --- | --- |
|  | **Mediana** | **% Panelistas en contra** | **Rango intercuartílico** | **Resultado** |
| **A. La inyección en el detrusor de onabotulinumtoxin A ¿es una alternativa eficaz y segura en el tratamiento de la VH rebelde a fármacos?** | | | | |
| 72. La inyección detrusoriana de onabotulinumtoxin A es una alternativa eficaz y segura en el tratamiento de la VH refractaria a anticolinérgicos. | 9 | 0 | 1 | Aceptada |
| 73. La inyección detrusoriana de onabotulinumtoxin A puede aumentar la incidencia de infecciones urinarias y de residuo postmiccional que condicione la necesidad de cateterismo limpio intermitente. | 8 | 12,8 | 2 | Aceptada |
| 74. La inyección de onabotulinumtoxin A en detrusor en la VH refractaria a anticolinérgicos es efectiva y segura en dosis de 200 U. | 8 | 15,4 | 2 | Aceptada |
| 75. No es recomendable utilizar onabotulinumtoxin A en la vejiga si la acomodación está disminuida por fibrosis, ya que la eficacia es menor. | 8 | 22 | 1 | Aceptada |

| **B. ¿Considera necesario establecer centros de referencia en el tratamiento de VH rebelde con onabotulinumtoxin A o neuromodulación?** | | | | |
| --- | --- | --- | --- | --- |
| 76. Para el tratamiento de la VH refractaria con onabotulinumtoxin A no es necesario establecer centros de referencia. | 8 | 12,2 | 2 | Aceptada |
| 77. Es recomendable que la neuromodulación de raíces sacras se desarrolle en centros de referencia. | 8 | 7,7 | 2 | Aceptada |
| 78. La escasez de centros de referencia para neuromodulación puede hacer que la VH refractaria esté infratratada. | 7 | 39 | 5 | No consenso |

| **C. ¿Existe una actitud consensuada sobre qué pruebas diagnósticas debemos disponer antes de inyectar onabotulinumtoxin A en el detrusor?** | | | | |
| --- | --- | --- | --- | --- |
| 79. No existe un listado consensuado de pruebas imprescindibles y aconsejadas previas a la inyección de toxina. | 7 | 46,3 | 4 | No consenso |
| 80. El estudio urodinámico es un prueba imprescindible antes de inyectar toxina. | 8 | 12,2 | 2 | Aceptada |
| 81. La medición de residuo postmiccional es imprescindible antes de la inyección de toxina. | 8 | 5,1 | 2 | Aceptada |
| 82. El diario miccional con escala de urgencia es necesario antes de la inyección y para evaluar la eficacia tras el tratamiento. | 8 | 5,1 | 2 | Aceptada |
| 83. El sedimento urinario y el cultivo son imprescindibles antes del tratamiento. | 9 | 5,1 | 1 | Aceptada |
| 84. La flujometría libre es una prueba recomendable, pero no imprescindible. | 7 | 18,9 | 1 | Aceptada |
| 85. La cistoscopia, citología y ecografía son pruebas recomendables, pero no imprescindibles. | 7 | 28,2 | 3 | Aceptada |

| **D. ¿Puede repetirse la inyección de onabotulinumtoxin A en el detrusor sin perder eficacia?** | | | | |
| --- | --- | --- | --- | --- |
| 86. La inyección repetida de onabotulinumtoxin A se ha demostrado segura. | 8 | 2,6 | 1 | Aceptada |
| 87. La inyección repetida de onabotulinumtoxin Amantiene su eficacia en el tiempo. | 8 | 20,5 | 2 | Aceptada |
| 88. La adherencia al tratamiento con onabotulinumtoxin Adisminuye tras inyecciones repetidas en el tiempo. | 7 | 17,1 | 0 | Aceptada |
| 89. Las inyecciones repetidas de onabotulinumtoxin A pueden aumentar el residuo postmiccional. | 7 | 39 | 4 | No consenso |

| **E. El tratamiento con onabotulinumtoxin A ¿es coste-efectivo respecto a otras terapias?** | | | | |
| --- | --- | --- | --- | --- |
| 90. El tratamiento de la IU por hiperactividad neurogénica del detrusor con onabotulinumtoxin A es superior en coste-efectividad al uso de anticolinérgicos. | 7 | 28,2 | 3 | Aceptada |
| 91. A corto-medio plazo, el tratamiento con onabotulinumtoxin A es superior en coste-efectividad con respecto a la neuromodulación sacra en la VH. | 8 | 15,4 | 2 | Aceptada |
| 92. A largo plazo, la neuromodulación sacra puede ser superior en términos coste-efectividad a la onabotulinumtoxin A en la VH. | 7 | 17,1 | 1 | Aceptada |
| 93. La onabotulinumtoxin A es superior en coste-efectividad a los anticolinérgicos en el tratamiento de la VH. | 7 | 25,6 | 3 | Aceptada |
